# Supplementary material for: Morphology control in the synthesis of [Mo3S13]2−/Co-MOF-74 composite catalysts and their application in the oxygen evolution reaction
Source: Royal Society of Chemistry journal article supplement (doi:10.1039/d3nj00887h), 2023-01-01
Supplement: d3nj00887h1.pdf [file d3nj00887h1.pdf]

## Supporting Information

### **Morphology control synthesis of $[\text{Mo}_3\text{S}_{13}]^{2-}/\text{Co-MOF-74}$ composite catalysts and their application in the oxygen evolution reaction**

**Jianxia Gu<sup>a\*</sup>, Jingting He<sup>b</sup>, Haiyan Zheng<sup>b</sup>, Chunyi Sun<sup>b\*</sup>**

*<sup>a</sup>Department of chemistry, Xinzhou Normal University, Xinzhou, Shanxi, China*

*<sup>b</sup>National & Local United Engineering Laboratory for Power Batteries, Department of Chemistry, Northeast Normal University, Changchun, Jilin, China.*

## Figures

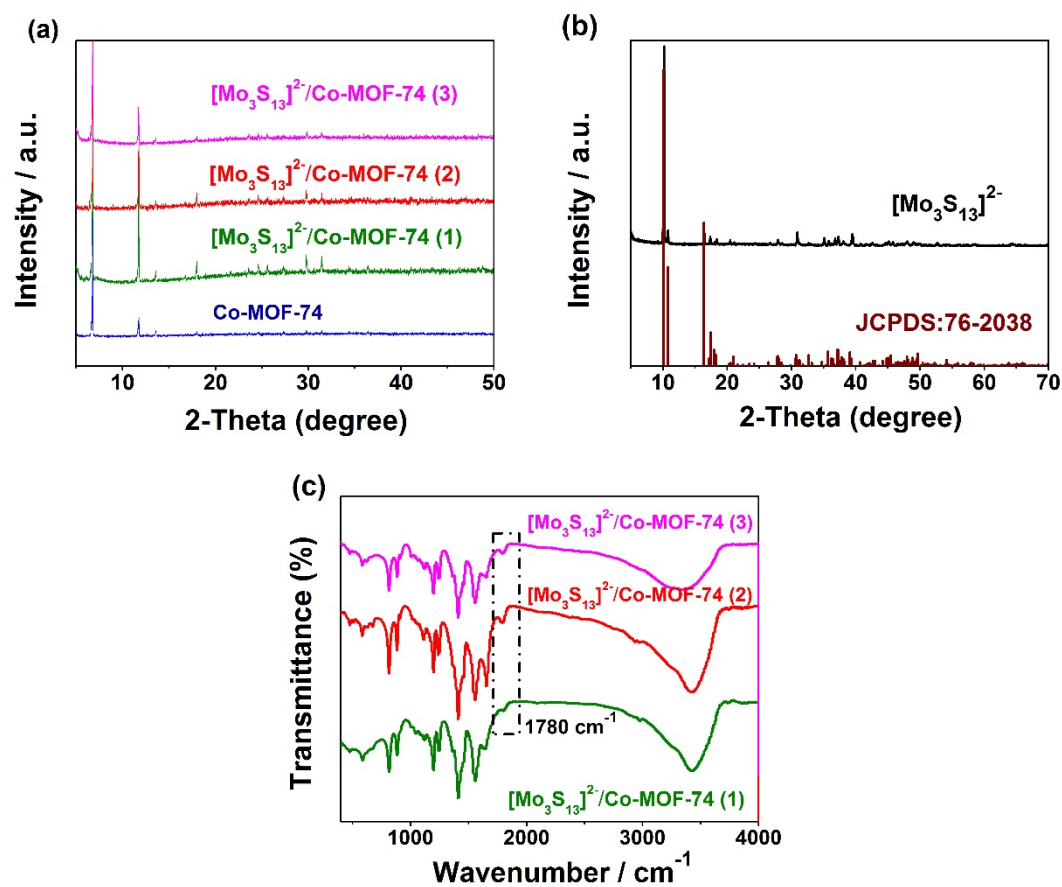

**Fig. S1** (a) X-ray diffraction patterns (XRD) of Co-MOF-74, Co-MOF-74/[Mo<sub>3</sub>S<sub>13</sub>]<sup>2-</sup> (1), Co-MOF-74/[Mo<sub>3</sub>S<sub>13</sub>]<sup>2-</sup> (2), and Co-MOF-74/[Mo<sub>3</sub>S<sub>13</sub>]<sup>2-</sup> (3). (b) XRD patterns of [Mo<sub>3</sub>S<sub>13</sub>]<sup>2-</sup> and a standard card of (NH<sub>4</sub>)<sub>2</sub>Mo<sub>3</sub>S<sub>13</sub>·nH<sub>2</sub>O (JCPDS 76-2038). (c) Fourier transformed infrared (FT-IR) spectra of Co-MOF-74/[Mo<sub>3</sub>S<sub>13</sub>]<sup>2-</sup> (1), Co-MOF-74/[Mo<sub>3</sub>S<sub>13</sub>]<sup>2-</sup> (2), and Co-MOF-74/[Mo<sub>3</sub>S<sub>13</sub>]<sup>2-</sup> (3).

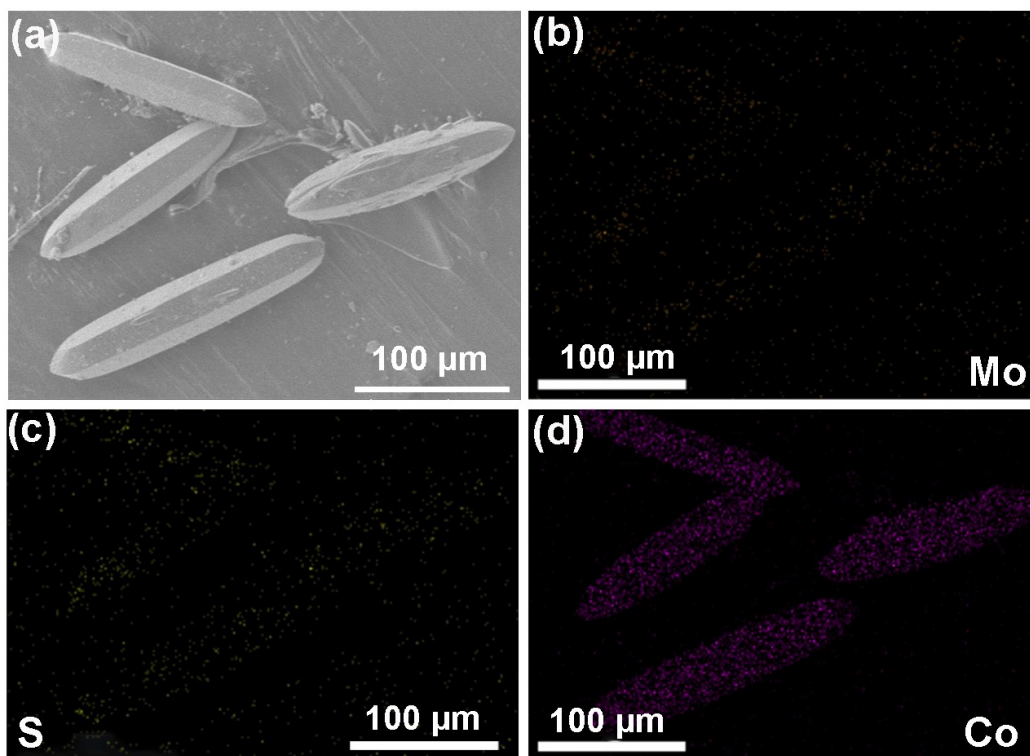

**Fig. S2** (a-d) The EDS elemental mapping for [Mo<sub>3</sub>S<sub>13</sub>]<sup>2-</sup>/Co-MOF-74 (2).

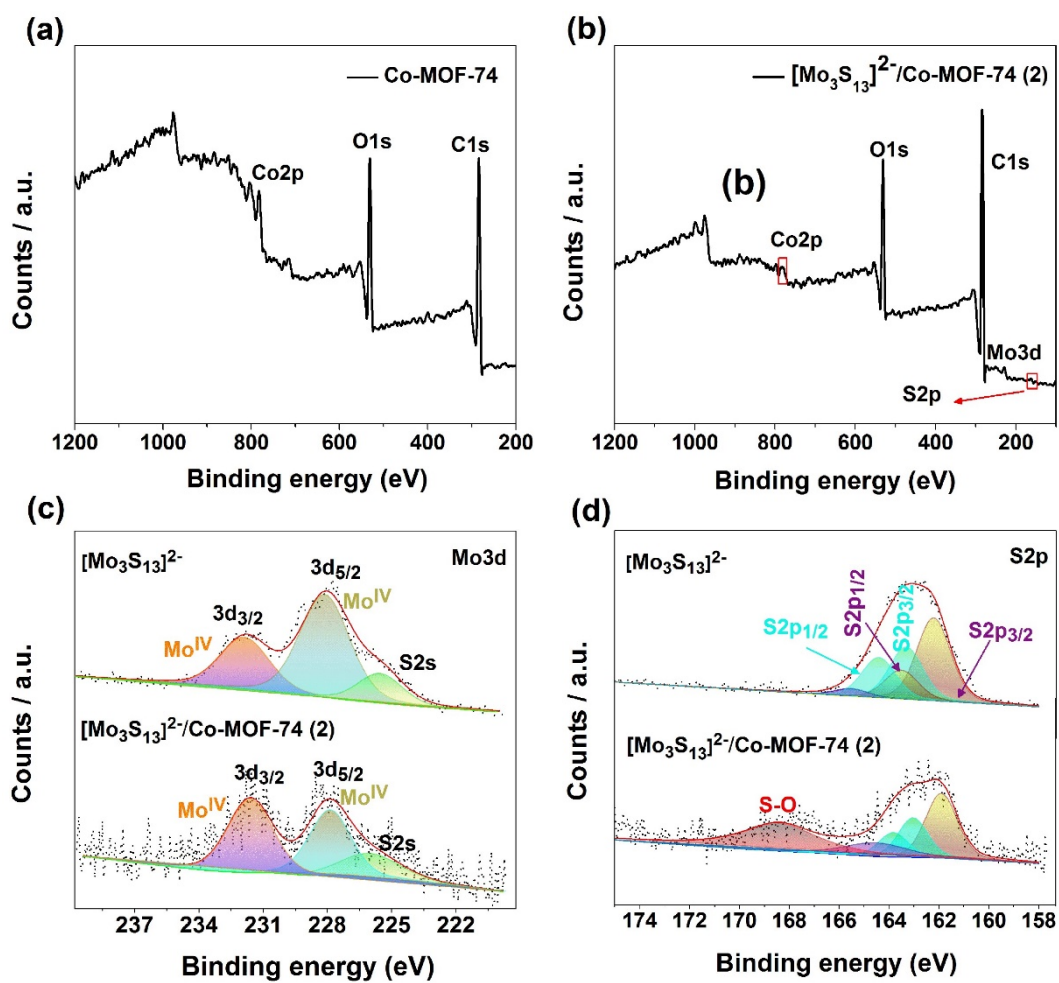

**Fig. S3** The survey X-ray photoelectron spectroscopy (XPS) spectra of Co-MOF-74 (a) and  $[\text{Mo}_3\text{S}_{13}]^{2-}/\text{Co-MOF-74 (2)}$  (b). The high-resolution XPS spectra of Mo 3d (c) and S 2p (d) in the  $[\text{Mo}_3\text{S}_{13}]^{2-}$  and  $[\text{Mo}_3\text{S}_{13}]^{2-}/\text{Co-MOF-74 (2)}$ .

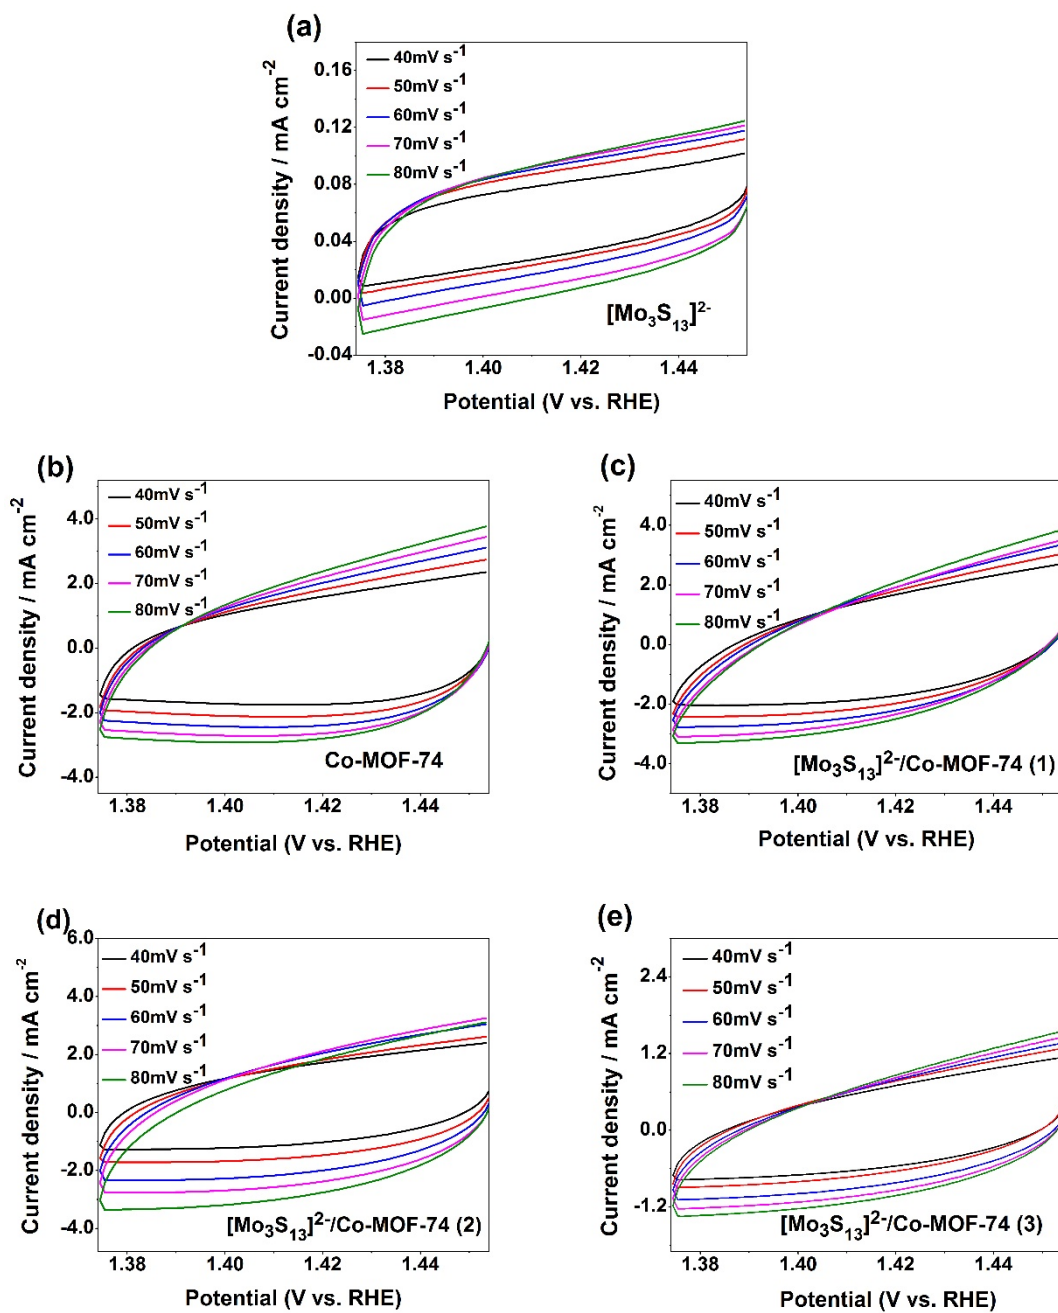

**Fig. S4** The CV curves under different scan rates (40 mV/s to 80 mV/s) for  $[\text{Mo}_3\text{S}_{13}]^{2-}$  (a), Co-MOF-74 (b),  $[\text{Mo}_3\text{S}_{13}]^{2-}/\text{Co-MOF-74 (1)}$  (c),  $[\text{Mo}_3\text{S}_{13}]^{2-}/\text{Co-MOF-74 (2)}$  (d) and  $[\text{Mo}_3\text{S}_{13}]^{2-}/\text{Co-MOF-74 (3)}$  (e) in 1 M KOH.

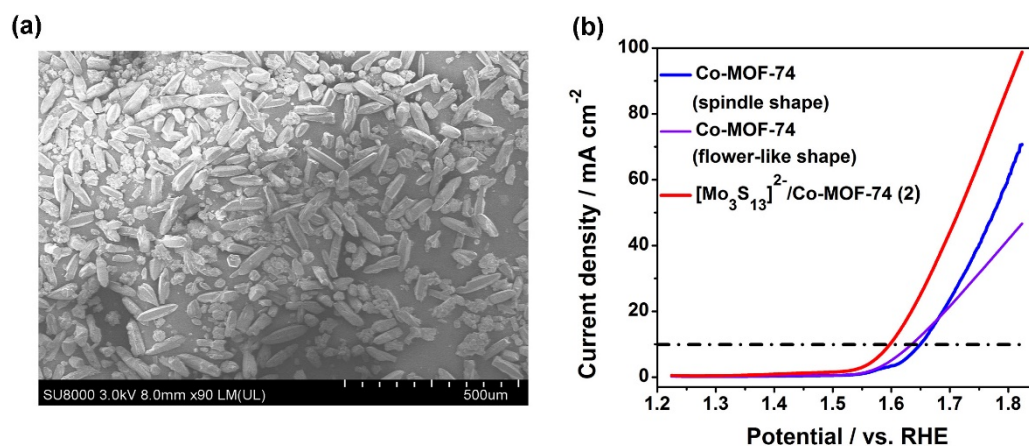

**Fig. S5** (a) Scanning electron microscopy (SEM) image of Co-MOF-74 with spindle morphology. (b) LSV curves of Co-MOF-74 and  $[\text{Mo}_3\text{S}_{13}]^{2-}/\text{Co-MOF-74}$  (**2**) with different morphologies in 1 M KOH solution.

**Table S1** The molar ratios of Mo and Co in different catalysts were determined by inductively coupled plasma mass spectrometry (ICP-MS).

| Samples                                                         | Feeding molar ratio<br>(Mo/Co) | Final molar ratio<br>(Mo/Co) |
|-----------------------------------------------------------------|--------------------------------|------------------------------|
| Co-MOF-74                                                       | 0                              | 0                            |
| $[\text{Mo}_3\text{S}_{13}]^{2-}/\text{Co-MOF-74}$ ( <b>1</b> ) | 0.07                           | 0.05                         |
| $[\text{Mo}_3\text{S}_{13}]^{2-}/\text{Co-MOF-74}$ ( <b>2</b> ) | 0.2                            | 0.07                         |
| $[\text{Mo}_3\text{S}_{13}]^{2-}/\text{Co-MOF-74}$ ( <b>3</b> ) | 0.4                            | 0.2                          |

**Table S2** Comparison of OER catalytic performance of some reported electrocatalysts and  $[\text{Mo}_3\text{S}_{13}]^{2-}/\text{Co-MOF-74}$  in alkaline solution.

| Catalyst                                                                 | Electrodes      | Electrolyte    | Over potential<br>(10 mA/cm <sup>2</sup> ) vs.<br>RHE<br>(V) | Tafer<br>slope<br>(mV dec <sup>-1</sup> ) | Ref.                 |
|--------------------------------------------------------------------------|-----------------|----------------|--------------------------------------------------------------|-------------------------------------------|----------------------|
| Fe/Co NH <sub>2</sub> BDC<br>MOF                                         | FTO             | 1M KOH         | 0.520                                                        | 101                                       | 1                    |
| RuO <sub>2</sub>                                                         | CP              | 1 M KOH        | 0.405                                                        | 126                                       | 2                    |
| Ni BTC                                                                   | CP              | 1 M KOH        | 0.346                                                        | 64                                        | 2                    |
| N-doped<br>Graphene CoO                                                  | RDE             | 1 M KOH        | 0.340                                                        | 71                                        | 3                    |
| Co NPs/N-C-800                                                           | RDE             | 1 M KOH        | 0.379                                                        | 61.4                                      | 4                    |
| Co-BTC                                                                   | GCE             | 1 M KOH        | 0.386                                                        | 84.78                                     | 5                    |
| ZIF-67@POM                                                               | GCE             | 1 M KOH        | 0.490                                                        | 88                                        | 6                    |
| CoO <sub>x</sub> -ZIF                                                    | GCE             | 0.1M<br>NaOH   | 0.318                                                        | 70.3                                      | 7                    |
| Co-ZIF-9                                                                 | FTO             | 0.1 KOH        | 0.510                                                        | 93                                        | 8                    |
| ZIF-67@NPC-2<br>(2:1)                                                    | RDE             | 0.1 M<br>KOH   | 0.410                                                        | 114                                       | 9                    |
| CoP/NCNHP                                                                | GCE             | 1 M KOH        | 0.310                                                        | 70                                        | 10                   |
| Mo-N/C@MoS <sub>2</sub>                                                  | GCE             | 1 M KOH        | 0.390                                                        | 72                                        | 11                   |
| NNU-23                                                                   | CC              | 0.1 M<br>KOH   | 0.365                                                        | 81.8                                      | 12                   |
| Co <sub>6</sub> Mo <sub>6</sub> C <sub>2</sub> @NCN<br>T-800             | GCE             | 1 M KOH        | 0.361                                                        | 48.37                                     | 13                   |
| FeNi-MOF-74                                                              | NF<br>(Ni foam) | 1 M KOH        | 0.223                                                        | 71.6                                      | 14                   |
| NiFc-MOF                                                                 | NF              | 1 M KOH        | 0.195                                                        | 44.1                                      | 15                   |
| Cu-Fe-NH <sub>2</sub> MOF                                                | NF              | 1 M KOH        | 0.33                                                         | 60.8                                      | 16                   |
| NiCo-UMOFNs                                                              | GCE             | 1 M KOH        | 0.189                                                        | 42                                        | 17                   |
| <b><math>[\text{Mo}_3\text{S}_{13}]^{2-}/\text{Co-MOF-74 (2)}</math></b> | <b>GCE</b>      | <b>1 M KOH</b> | <b>0.368</b>                                                 | <b>90.6</b>                               | <b>This<br/>work</b> |

## References

- S1 B. Iqbal, M. Saleem, S. N. Arshad, J. Rashid, N. Hussain and M. Zaheer, *Chemistry*, 2019, **25**, 10490-10498.
- S2 V. Maruthapandian, S. Kumaraguru, S. Mohan, V. Saraswathy and S. Muralidharan, *Chemelectrochem*, 2018, **5**, 2795-2807.
- S3 S. Mao, Z. Wen, T. Huang, Y. Hou and J. Chen, *Energy Environ. Sci.*, 2014, **7**, 609-616.
- S4 Y. Su, Y. Zhu, H. Jiang, J. Shen, X. Yang, W. Zou, J. Chen and C. Li, *Nanoscale*, 2014, **6**, 15080-15089.
- S5 L. Yaqoob, T. Noor, N. Iqbal, H. Nasir, M. Sohail, N. Zaman and M. Usman, *Renew Energ*, 2020, **156**, 1040-1054.
- S6 Y. Wang, Y. Y. Wang, L. Zhang, C. S. Liu and H. Pang, *Inorg. Chem. Front.*, 2019, **6**, 2514-2520.
- S7 S. Dou, C. L. Dong, Z. Hu, Y. C. Huang, J. I. Chen, L. Tao, D. Yan, D. Chen, S. Shen, S. Chou and S. Wang, *Adv. Funct. Mater.*, 2017, **27**, 1702546.
- S8 S. Wang, Y. Hou, S. Lin and X. Wang, *Nanoscale*, 2014, **6**, 9930-9934.
- S9 H. Wang, F.-X. Yin, B.-H. Chen, X.-B. He, P.-L. Lv, C.-Y. Ye and D.-J. Liu, *Appl. Catal. B Environ.*, 2017, **205**, 55-67.
- S10 Y. Pan, K. A. Sun, S. J. Liu, X. Cao, K. L. Wu, W. C. Cheong, Z. Chen, Y. Wang, Y. Li, Y. Q. Liu, D. S. Wang, Q. Peng, C. Chen and Y. D. Li, *J. Am. Chem. Soc.*, 2018, **140**, 2610-2618.
- S11 I. S. Amiin, Z. Pu, X. Liu, K. A. Owusu, H. G. R. Monestel, F. O. Boakye, H. Zhang and S. Mu, *Adv. Funct. Mater.*, 2017, **27**, 1702300.
- S12 X. L. Wang, L. Z. Dong, M. Qiao, Y. J. Tang, J. Liu, Y. Li, S. L. Li, J. X. Su and Y. Q. Lan, *Angew. Chem. Int. Ed.*, 2018, **57**, 9660-9664.
- S13 X. Feng, X. Bo and L. Guo, *J. Colloid Interface Sci.*, 2020, **575**, 69-77.
- S14 J. Xing, K. Guo, Z. Zou, M. Cai, J. Du and C. Xu, *Chem. Commun.*, 2018, **54**, 7046-7049.
- S15 J. Liang, X. Gao, B. Guo, Y. Ding, J. Yan, Z. Guo, E. C. M. Tse and J. Liu, *Angew. Chem. Int. Ed.*, 2021, **60**, 12770-12774.



S16 N. K. Shrestha, S. A. Patil, S. Cho, Y. Jo, H. Kim and H. Im, *J. Mater. Chem. A*, 2020, **8**, 24408-24418.

S17 S. Zhao, Y. Wang, J. Dong, C.-T. He, H. Yin, P. An, K. Zhao, X. Zhang, C. Gao, L. Zhang, J. Lv, J. Wang, J. Zhang, A. M. Khattak, N. A. Khan, Z. Wei, J. Zhang, S. Liu, H. Zhao and Z. Tang, *Nat. Energy*, 2016, **1**, 16184.
